# Supplementary material
Source: bioRxiv or medRxiv preprint supplement (https://www.biorxiv.org/highwire/filestream/55493/field_highwire_adjunct_files/0/183384-1.pdf)
Supplement: Supplementary file [file 183384-1.pdf]

## SEMI-PARAMETRIC COVARIATE-MODULATED LOCAL FALSE DISCOVERY RATE FOR GENOME-WIDE ASSOCIATION STUDIES

BY RONG W. ZABLOCKI<sup>†,‡</sup>, RICHARD A. LEVINE<sup>†</sup> ANDREW J.  
SCHORK<sup>§</sup> SHUJING XU<sup>§</sup> YUNPENG WANG<sup>¶</sup> CHUN C. FAN<sup>§</sup> AND WESLEY  
K. THOMPSON<sup>§,||,\*\*,\*</sup>

*San Diego State University<sup>†</sup>, Claremont Graduate University<sup>‡</sup>, University  
of California at San Diego<sup>§</sup>, University of Oslo, Norway<sup>¶</sup>, Institute of  
Biological Psychiatry<sup>||</sup>, and The Lundbeck Foundation Initiative for  
Integrative Psychiatric Research<sup>\*\*</sup>*

### 1. Supplement A: Conditional Posteriors and Gibbs Sampling Algorithm.

1.1. *Conditional posterior densities.* The full conditional distributions for the unknown parameters may be obtained as follows. Throughout,  $f(\cdot|\dots)$  denotes the kernel probability density of a parameter conditioned on all other parameters and the data. First,

$$(1.1) \quad f(\boldsymbol{\alpha}_m \cdot | \dots) \propto \exp \left\{ -\frac{1}{2\tau_m^2} \left( \boldsymbol{\alpha}_{m(2:K)} \boldsymbol{\Omega}^* \boldsymbol{\alpha}_{m(2:K)}^T + \sum_{j=0; j \neq m}^M \left[ \boldsymbol{\alpha}_{j(2:K)} \boldsymbol{\Omega}^* \boldsymbol{\alpha}_{j(2:K)}^T \right] \right) \right\} \\ \prod_{i; \delta_i=1} \prod_{k=1}^K \left[ \left\{ \frac{\exp(x_{im} \alpha_{mk} + \mathbf{x}_{i(-m)}^T \boldsymbol{\alpha}_{(-m)k})}{\sum_{l=1}^K \exp(x_{im} \alpha_{ml} + \mathbf{x}_{i(-m)}^T \boldsymbol{\alpha}_{(-m)l})} \right\}^{I(\eta_i=k)} \right].$$

The last part of (1.1) is equivalent to  $\prod_{i; \delta_i=1} \prod_{k=1}^K \left[ \left\{ \frac{\exp(\mathbf{x}_i^T \boldsymbol{\alpha}_{\cdot k})}{\sum_{l=1}^K \exp(\mathbf{x}_i^T \boldsymbol{\alpha}_{\cdot l})} \right\}^{I(\eta_i=k)} \right]$ , except that (1.1) separates the terms of the  $m^{\text{th}}$  covariate from all the other covariates (denoted by a  $-m$  subscript).

---

\*To whom correspondence should be addressed.

2

Second,

$$\begin{aligned}
 (1.2) \quad f(\tau_m^2 | \dots) &\propto (\tau_m^2)^{-\frac{K-1}{2}} \exp \left\{ -\frac{1}{2\tau_m^2} \boldsymbol{\alpha}_m(2:K) \boldsymbol{\Omega}^* \boldsymbol{\alpha}_m(2:K)^T \right\} (\tau_m^2)^{(-\frac{\nu}{2}-1)} \exp \left( -\frac{\nu}{\tau_m^2} \right) \\
 &\sim \text{Inverse Gamma} \left( \frac{K + \nu - 1}{2}, \frac{\boldsymbol{\alpha}_m(2:K) \boldsymbol{\Omega}^* \boldsymbol{\alpha}_m(2:K)^T}{2} + \frac{\nu}{a_m} \right).
 \end{aligned}$$

Third,

$$\begin{aligned}
 (1.3) \quad f(a_m | \dots) &\propto a_m^{-\frac{\nu}{2}} \exp \left( -\frac{\nu}{\tau_m^2} \right) a_m^{-\frac{1}{2}-1} \exp \left( -\frac{1}{a_m} \right) \\
 &\sim \text{Inverse Gamma} \left( \frac{\nu + 1}{2}, \frac{\nu}{\tau_m^2} + \frac{1}{A^2} \right).
 \end{aligned}$$

Fourth,

$$\begin{aligned}
 (1.4) \quad f(\sigma_0^2 | \dots) &\propto (\sigma_0^2)^{-(\frac{N_0}{2} + a_0) - 1} \exp \left\{ -\frac{1}{\sigma_0^2} \left( \frac{\mathbf{z}_0^T \mathbf{z}_0}{2} + b_0 \right) \right\} \\
 &\sim \text{Inverse Gamma} \left( \frac{N_0}{2} + a_0, \frac{\mathbf{z}_0^T \mathbf{z}_0}{2} + b_0 \right).
 \end{aligned}$$

Fifth,

$$(1.5) \quad f(\boldsymbol{\gamma} | \dots) \propto \prod_{i=1}^N \left[ \left\{ \frac{\exp(\mathbf{x}_i^T \boldsymbol{\gamma})}{1 + \exp(\mathbf{x}_i^T \boldsymbol{\gamma})} \right\}^{\delta_i} \left\{ \frac{1}{1 + \exp(\mathbf{x}_i^T \boldsymbol{\gamma})} \right\}^{1 - \delta_i} \right] \exp \left( -\frac{\boldsymbol{\gamma} \boldsymbol{\Sigma}_{\boldsymbol{\gamma}}^{-1} \boldsymbol{\gamma}}{2} \right).$$

The distributions in (1.1) and (1.5) do not take any standard distributional form.

1.2. *Sampling Scheme.* In GWAS, each SNP is coded as a count of the number of reference alleles (i.e., 0, 1, or 2). Since choice of reference allele is essentially random with respect to the outcome, the resulting distribution of  $z$ -scores is modeled as symmetric around zero. It is straightforward

to allow for asymmetry if necessary in other applications of cmfdr. In the present case, in order to simplify the implementation, we fold both the null and non-null distributions at zero. Hence, the null distribution becomes a folded normal distribution with location 0 and scale  $\sigma_0^2$ , and the non-null distribution is constructed on the absolute value of  $z$ -scores. The parameters  $\boldsymbol{\alpha}$ ,  $\boldsymbol{\tau}^2$ ,  $\mathbf{a}$ ,  $\boldsymbol{\gamma}$  and  $\sigma_0^2$  are sampled in turn from their full conditional distributions via a Gibbs sampler. At each iteration,  $\sigma_0^2$  can be sampled directly from its posterior inverse gamma distribution;  $\tau_m^2$  and  $a_m$  can be sampled from their respective posterior inverse gamma distributions recursively from  $m = 0$  to  $M$ . The matrix parameter  $\boldsymbol{\alpha}$  is generated through components  $\boldsymbol{\alpha}_{m\cdot}$ . At each iteration,  $\boldsymbol{\alpha}_{m\cdot}$  may be updated recursively based on (1.1) for  $m = 0, 1, 2, \dots, M$ . While updating  $\boldsymbol{\alpha}_{m\cdot}$ , all the other  $\boldsymbol{\alpha}_{-m\cdot}$  are treated as constant. This is the reason that formula (1.1) separates terms with and without  $m$ . Since both  $\boldsymbol{\alpha}_{m\cdot}$  and  $\boldsymbol{\gamma}$  do not take standard form, variates are generated using multiple-try Metropolis-Hastings (MTMH) samplers (Givens and Hoeting, 2005). Multivariate- $t$  candidate distributions are used in the MTMH sampler with parameters obtained by maximizing  $\boldsymbol{\alpha}_{m\cdot}$  and  $\boldsymbol{\gamma}$  over (1.1) and (1.5) respectively. That is, the maximizers and the corresponding negative inverse Hessian of (1.1) and (1.5) are used as parameters in the MTMH routine.

Two indicators,  $\boldsymbol{\delta}$  and  $\boldsymbol{\eta}$ , also require updating during each Gibbs iteration. At the global level for each test, we update  $\delta_i$  to be either 1 or 0 based on the probabilities

$$\frac{\exp(\mathbf{x}_i^T \boldsymbol{\gamma}) f_1(|z_i| | \boldsymbol{\alpha}, \mathbf{x}_i)}{\exp(\mathbf{x}_i^T \boldsymbol{\gamma}) f_1(|z_i| | \boldsymbol{\alpha}, \mathbf{x}_i) + f_0(|z_i| | \sigma_0^2)}, \text{ and}$$

$$\frac{f_0(|z_i| | \sigma_0^2)}{\exp(\mathbf{x}_i^T \boldsymbol{\gamma}) f_1(|z_i| | \boldsymbol{\alpha}, \mathbf{x}_i) + f_0(|z_i| | \sigma_0^2)}.$$

The indicator  $\boldsymbol{\delta}$  may be initialized by taking an upper percentile (e.g., upper 5%) of the  $|z_i|$  scores as 1 and 0 otherwise. At the local level, for each non-null

test, we update  $\eta_i$  to be one of the  $(1, 2, \dots, K)$  based on the  $K$  probabilities

$$\begin{aligned} & \frac{\exp(\mathbf{x}_{i,\delta_i=1}^T \boldsymbol{\alpha} \cdot \mathbf{1}) g_1(|z_{i,\delta_i=1}|)}{\sum_{k=1}^K [\exp(\mathbf{x}_{i,\delta_i=1}^T \boldsymbol{\alpha} \cdot \mathbf{k}) g_k(|z_{i,\delta_i=1}|)]}, \\ & \frac{\exp(\mathbf{x}_{i,\delta_i=1}^T \boldsymbol{\alpha} \cdot \mathbf{2}) g_2(|z_{i,\delta_i=1}|)}{\sum_{k=1}^K [\exp(\mathbf{x}_{i,\delta_i=1}^T \boldsymbol{\alpha} \cdot \mathbf{k}) g_k(|z_{i,\delta_i=1}|)]}, \\ & \vdots \\ & \frac{\exp(\mathbf{x}_{i,\delta_i=1}^T \boldsymbol{\alpha} \cdot \mathbf{K}) g_K(|z_{i,\delta_i=1}|)}{\sum_{k=1}^K [\exp(\mathbf{x}_{i,\delta_i=1}^T \boldsymbol{\alpha} \cdot \mathbf{k}) g_k(|z_{i,\delta_i=1}|)]}. \end{aligned}$$

If we have  $L$  draws  $\{(\boldsymbol{\alpha}^{(l)}, \boldsymbol{\tau}^{2(l)}, \mathbf{a}^{(l)}, \boldsymbol{\gamma}^{(l)}, \sigma_0^{2(l)}) : 1 \leq l \leq L\}$  from the Gibbs sampler, then for each draw  $l$ ,

$$\text{cmfdr}^{(l)}(z_i) = \frac{\pi_0(\mathbf{x}_i | \boldsymbol{\gamma}^{(l)}) f_0(|z_i| | \sigma_0^{2(l)})}{\pi_0(\mathbf{x}_i | \boldsymbol{\gamma}^{(l)}) f_0(|z_i| | \sigma_0^{2(l)}) + \pi_1(\mathbf{x}_i | \boldsymbol{\gamma}^{(l)}) f_1(|z_i| | \boldsymbol{\alpha}^{(l)}, \mathbf{x}_i)}.$$

Hence, an *a posteriori* estimate of  $\text{cmfdr}(z_i)$  for each test can be obtained. Due to the symmetry of  $f_1$  and  $f_0$ , if two tests have the same covariates and same absolute value (opposite sign) of  $z$ -score, their  $\text{cmfdr}$  values will be the same. On the other hand, if two tests have identical  $z$ -scores but different covariates, their  $\text{cmfdr}$  values will be different. The algorithm has been implemented in the R statistical package ([R Core Team, 2016](#)). The simulations were run on a cluster with 27 Dell PowerEdge C1100 nodes. Each node contains 75 gigabytes (GB) of RAM and dual Intel Xeon X5650 2.66GHz processors with 6 cores for a total of 2025 GB of RAM and 324 cores. A MCMC chain of 18,000 iterations with 50,000 cases took about 20 hours for the semi-parametric  $\text{cmfdr}$  and about 12 hours for  $\text{fdr}$ . As for the real data application, all models were run on a Linux Intel Xeon E5-2660 2.20GHz processor with 20 cores for a total of 400 GB of memory. An example of computational resource allocation for a MCMC chain of 23,000 iterations with 74,800 SNPs is shown in [Table 1](#). There is no surprise that the semi-parametric model with covariates is more computationally expensive.

TABLE 1  
*Computational resource allocation on three different models.*

|                            | semi-parametric cmfdr | gamma cmfdr | fdr |
|----------------------------|-----------------------|-------------|-----|
| Virtual memory (megabyte)  | 507                   | 459         | 495 |
| Physical memory (megabyte) | 261                   | 218         | 249 |
| Time to finish (hours)     | 55                    | 16          | 16  |

## 2. Supplement B: KEGG *homo sapiens* pathways with ALIGATOR *p*-values from three models (full list).

Table 2: KEGG *homo sapiens* pathways with ALIGATOR *p*-values from three models (full list).

| Pathway                                          | <i>p</i> -values<br>(semi-<br>parametric) | <i>p</i> -values<br>(gamma) | <i>p</i> -values<br>(fdr) |
|--------------------------------------------------|-------------------------------------------|-----------------------------|---------------------------|
| Axon guidance                                    | 6.00E-04                                  | 0.002                       | 0.2046                    |
| Herpes simplex infection                         | 8.00E-04                                  | 0.0268                      | 1                         |
| Osteoclast differentiation                       | 0.0062                                    | 0.0192                      | 1                         |
| Pentose phosphate pathway                        | 0.0096                                    | 0.5206                      | 1                         |
| Tuberculosis                                     | 0.01                                      | 0.0068                      | 0.132                     |
| Leishmaniasis                                    | 0.0162                                    | 0.0946                      | 1                         |
| Antigen processing and presentation              | 0.022                                     | 0.096                       | 1                         |
| Taste transduction                               | 0.033                                     | 1                           | 1                         |
| Cytokine-cytokine receptor interaction           | 0.037                                     | 0.0378                      | 1                         |
| Cell adhesion molecules (CAMs)                   | 0.0446                                    | 0.131                       | 1                         |
| Calcium signaling pathway                        | 0.0506                                    | 0.1038                      | 0.964                     |
| HTLV-I infection                                 | 0.0554                                    | 0.2448                      | 1                         |
| Oocyte meiosis                                   | 0.0622                                    | 0.8218                      | 0.53                      |
| Inflammatory mediator regulation of TRP channels | 0.0632                                    | 0.1076                      | 1                         |
| Prion diseases                                   | 0.0642                                    | 0.0066                      | 1                         |
| TNF signaling pathway                            | 0.0654                                    | 0.1124                      | 1                         |
| NF-kappa B signaling pathway                     | 0.0672                                    | 0.0932                      | 1                         |
| Alzheimer's disease                              | 0.079                                     | 1                           | 1                         |
| Amoebiasis                                       | 0.0832                                    | 0.2278                      | 1                         |
| Pyruvate metabolism                              | 0.0874                                    | 0.086                       | 1                         |
| Amyotrophic lateral sclerosis (ALS)              | 0.0892                                    | 1                           | 1                         |
| Mucin type O-Glycan biosynthesis                 | 0.0902                                    | 0.0366                      | 1                         |
| Natural killer cell mediated cytotoxicity        | 0.0906                                    | 0.625                       | 1                         |
| Circadian rhythm                                 | 0.0946                                    | 0.096                       | 1                         |
| Colorectal cancer                                | 0.0966                                    | 0.0354                      | 1                         |
| NOD-like receptor signaling pathway              | 0.0996                                    | 0.0946                      | 1                         |
| Cocaine addiction                                | 0.102                                     | 0.608                       | 0.7526                    |
| Apoptosis                                        | 0.1094                                    | 0.4852                      | 1                         |
| T cell receptor signaling pathway                | 0.1172                                    | 0.5708                      | 1                         |
| Measles                                          | 0.1208                                    | 0.512                       | 1                         |

*Continued on next page*

Table 2 – Continued from previous page

| Pathway                                       | <i>p</i> -values<br>(semi-<br>parametric) | <i>p</i> -values<br>(gamma) | <i>p</i> -values<br>(fdr) |
|-----------------------------------------------|-------------------------------------------|-----------------------------|---------------------------|
| Hippo signaling pathway                       | 0.121                                     | 0.2616                      | 0.7768                    |
| MAPK signaling pathway                        | 0.1214                                    | 0.1802                      | 0.4044                    |
| Salmonella infection                          | 0.1288                                    | 0.0486                      | 1                         |
| Glycine, serine and threonine metabolism      | 0.1292                                    | 0.0288                      | 0.512                     |
| B cell receptor signaling pathway             | 0.13                                      | 0.3578                      | 1                         |
| Adipocytokine signaling pathway               | 0.1312                                    | 0.309                       | 1                         |
| TGF-beta signaling pathway                    | 0.1342                                    | 0.0946                      | 1                         |
| Circadian entrainment                         | 0.1394                                    | 0.0632                      | 0.7466                    |
| Neurotrophin signaling pathway                | 0.1498                                    | 0.8606                      | 0.5142                    |
| Influenza A                                   | 0.1518                                    | 0.3702                      | 1                         |
| Steroid hormone biosynthesis                  | 0.1558                                    | 1                           | 1                         |
| Melanogenesis                                 | 0.1582                                    | 0.0292                      | 1                         |
| Amphetamine addiction                         | 0.1644                                    | 0.0952                      | 0.7156                    |
| Malaria                                       | 0.173                                     | 0.3094                      | 1                         |
| African trypanosomiasis                       | 0.173                                     | 0.3094                      | 1                         |
| Cysteine and methionine metabolism            | 0.174                                     | 1                           | 1                         |
| Inflammatory bowel disease (IBD)              | 0.1746                                    | 1                           | 1                         |
| Fructose and mannose metabolism               | 0.1748                                    | 1                           | 1                         |
| Dorso-ventral axis formation                  | 0.1766                                    | 0.0946                      | 1                         |
| RIG-I-like receptor signaling pathway         | 0.1774                                    | 1                           | 1                         |
| Cytosolic DNA-sensing pathway                 | 0.1774                                    | 1                           | 1                         |
| Sphingolipid metabolism                       | 0.182                                     | 1                           | 1                         |
| Parkinson's disease                           | 0.1824                                    | 1                           | 0.8924                    |
| Cell cycle                                    | 0.19                                      | 0.4334                      | 0.5142                    |
| Butanoate metabolism                          | 0.2126                                    | 0.5142                      | 1                         |
| Vasopressin-regulated water reabsorption      | 0.2214                                    | 0.096                       | 1                         |
| Bacterial invasion of epithelial cells        | 0.2224                                    | 0.5174                      | 1                         |
| Hepatitis B                                   | 0.23                                      | 0.0686                      | 1                         |
| cGMP-PKG signaling pathway                    | 0.2406                                    | 0.0804                      | 0.716                     |
| ErbB signaling pathway                        | 0.2652                                    | 0.4032                      | 1                         |
| Toxoplasmosis                                 | 0.2832                                    | 0.3702                      | 1                         |
| Shigellosis                                   | 0.2972                                    | 0.0486                      | 1                         |
| Thyroid hormone synthesis                     | 0.299                                     | 0.232                       | 0.784                     |
| Wnt signaling pathway                         | 0.3252                                    | 0.8844                      | 1                         |
| Notch signaling pathway                       | 0.331                                     | 1                           | 1                         |
| Basal cell carcinoma                          | 0.3372                                    | 0.5162                      | 1                         |
| Pathways in cancer                            | 0.3376                                    | 0.3212                      | 1                         |
| Glycosphingolipid biosynthesis - globo series | 0.3394                                    | 1                           | 1                         |
| Regulation of actin cytoskeleton              | 0.382                                     | 0.3706                      | 1                         |
| VEGF signaling pathway                        | 0.4154                                    | 0.718                       | 1                         |
| Leukocyte transendothelial migration          | 0.4224                                    | 0.2996                      | 1                         |
| Purine metabolism                             | 0.4236                                    | 1                           | 0.9564                    |
| Bladder cancer                                | 0.4426                                    | 0.4118                      | 1                         |
| Arachidonic acid metabolism                   | 0.4488                                    | 0.677                       | 0.7718                    |
| Insulin signaling pathway                     | 0.4504                                    | 0.313                       | 1                         |

*Continued on next page*

Table 2 – Continued from previous page

| Pathway                                                    | <i>p</i> -values<br>(semi-<br>parametric) | <i>p</i> -values<br>(gamma) | <i>p</i> -values<br>(fdr) |
|------------------------------------------------------------|-------------------------------------------|-----------------------------|---------------------------|
| Glutamatergic synapse                                      | 0.4554                                    | 0.9532                      | 0.7688                    |
| cAMP signaling pathway                                     | 0.4558                                    | 0.0974                      | 0.9612                    |
| AMPK signaling pathway                                     | 0.4568                                    | 0.2242                      | 1                         |
| Estrogen signaling pathway                                 | 0.459                                     | 0.1794                      | 1                         |
| Long-term potentiation                                     | 0.4678                                    | 0.4244                      | 0.8624                    |
| Fc gamma R-mediated phagocytosis                           | 0.4682                                    | 0.6288                      | 0.6598                    |
| Oxytocin signaling pathway                                 | 0.4716                                    | 0.3274                      | 0.8514                    |
| Non-alcoholic fatty liver disease (NAFLD)                  | 0.479                                     | 1                           | 1                         |
| Thyroid cancer                                             | 0.4884                                    | 0.7138                      | 1                         |
| Chemokine signaling pathway                                | 0.5262                                    | 0.7434                      | 1                         |
| Adherens junction                                          | 0.5422                                    | 0.3858                      | 1                         |
| Cholinergic synapse                                        | 0.5538                                    | 0.4278                      | 0.5386                    |
| Retrograde endocannabinoid signaling                       | 0.5574                                    | 0.5982                      | 1                         |
| Gap junction                                               | 0.5602                                    | 0.7518                      | 0.9534                    |
| Vascular smooth muscle contraction                         | 0.5624                                    | 0.6296                      | 1                         |
| HIF-1 signaling pathway                                    | 0.5664                                    | 0.3702                      | 1                         |
| PI3K-Akt signaling pathway                                 | 0.5668                                    | 0.056                       | 0.7768                    |
| Toll-like receptor signaling pathway                       | 0.5708                                    | 0.1398                      | 1                         |
| Inositol phosphate metabolism                              | 0.5916                                    | 1                           | 1                         |
| Phosphatidylinositol signaling system                      | 0.5916                                    | 1                           | 1                         |
| Chronic myeloid leukemia                                   | 0.6112                                    | 0.805                       | 1                         |
| Chagas disease (American trypanosomiasis)                  | 0.6184                                    | 0.0666                      | 1                         |
| Lysine degradation                                         | 0.6206                                    | 1                           | 1                         |
| Focal adhesion                                             | 0.6422                                    | 0.5276                      | 1                         |
| Glycosphingolipid biosynthesis - lacto and neolacto series | 0.6526                                    | 1                           | 1                         |
| ECM-receptor interaction                                   | 0.6582                                    | 1                           | 1                         |
| Renal cell carcinoma                                       | 0.66                                      | 0.801                       | 1                         |
| Prostate cancer                                            | 0.6608                                    | 0.2842                      | 1                         |
| Proteoglycans in cancer                                    | 0.6744                                    | 0.5572                      | 1                         |
| Hedgehog signaling pathway                                 | 0.6994                                    | 0.7662                      | 1                         |
| Morphine addiction                                         | 0.7038                                    | 1                           | 1                         |
| Insulin secretion                                          | 0.708                                     | 0.801                       | 1                         |
| Rap1 signaling pathway                                     | 0.7166                                    | 0.763                       | 0.9928                    |
| Thyroid hormone signaling pathway                          | 0.7388                                    | 0.6332                      | 1                         |
| Pertussis                                                  | 0.7656                                    | 0.6326                      | 1                         |
| Platelet activation                                        | 0.7762                                    | 0.4428                      | 1                         |
| Jak-STAT signaling pathway                                 | 0.7918                                    | 1                           | 1                         |
| Signaling pathways regulating pluripotency of stem cells   | 0.7926                                    | 0.6508                      | 1                         |
| Epstein-Barr virus infection                               | 0.7936                                    | 1                           | 1                         |
| Type II diabetes mellitus                                  | 0.794                                     | 0.6974                      | 1                         |
| GnRH signaling pathway                                     | 0.8004                                    | 0.2552                      | 1                         |
| mTOR signaling pathway                                     | 0.8034                                    | 0.5968                      | 1                         |
| Adrenergic signaling in cardiomyocytes                     | 0.8068                                    | 0.0134                      | 0.9956                    |
| GABAergic synapse                                          | 0.8304                                    | 0.7428                      | 1                         |
| beta-Alanine metabolism                                    | 0.8356                                    | 0.6766                      | 0.5264                    |

*Continued on next page*

Table 2 – *Continued from previous page*

| Pathway                                                    | <i>p</i> -values<br>(semi-<br>parametric) | <i>p</i> -values<br>(gamma) | <i>p</i> -values<br>(fdr) |
|------------------------------------------------------------|-------------------------------------------|-----------------------------|---------------------------|
| Drug metabolism - other enzymes                            | 0.8356                                    | 0.6766                      | 0.5264                    |
| Fc epsilon RI signaling pathway                            | 0.8394                                    | 0.5604                      | 1                         |
| Acute myeloid leukemia                                     | 0.8416                                    | 0.5968                      | 1                         |
| Non-small cell lung cancer                                 | 0.8416                                    | 0.5968                      | 1                         |
| Pancreatic cancer                                          | 0.8416                                    | 0.5968                      | 1                         |
| Endometrial cancer                                         | 0.8416                                    | 0.5968                      | 1                         |
| Prolactin signaling pathway                                | 0.8442                                    | 0.5606                      | 1                         |
| MicroRNAs in cancer                                        | 0.8496                                    | 0.1518                      | 0.3328                    |
| Pantothenate and CoA biosynthesis                          | 0.864                                     | 0.7748                      | 0.5264                    |
| Tight junction                                             | 0.8834                                    | 0.17                        | 1                         |
| Long-term depression                                       | 0.8862                                    | 0.4218                      | 0.5324                    |
| Dopaminergic synapse                                       | 0.8868                                    | 0.015                       | 0.925                     |
| Glioma                                                     | 0.9018                                    | 0.5968                      | 1                         |
| Progesterone-mediated oocyte maturation                    | 0.9018                                    | 0.7476                      | 1                         |
| FoxO signaling pathway                                     | 0.9022                                    | 0.7088                      | 1                         |
| Serotonergic synapse                                       | 0.9106                                    | 0.9062                      | 1                         |
| Hepatitis C                                                | 0.9122                                    | 0.1406                      | 1                         |
| Pyrimidine metabolism                                      | 0.9238                                    | 0.9284                      | 0.5336                    |
| Dilated cardiomyopathy                                     | 0.9456                                    | 1                           | 1                         |
| Melanoma                                                   | 0.957                                     | 0.7938                      | 1                         |
| Alcoholism                                                 | 0.9636                                    | 0.9998                      | 0.0822                    |
| Olfactory transduction                                     | 0.9852                                    | 0.9458                      | 0.9826                    |
| Ras signaling pathway                                      | 0.9864                                    | 0.8614                      | 1                         |
| Pathogenic Escherichia coli infection                      | 1                                         | 0.092                       | 1                         |
| N-Glycan biosynthesis                                      | 1                                         | 0.1164                      | 0.2634                    |
| Pentose and glucuronate interconversions                   | 1                                         | 0.3054                      | 1                         |
| Epithelial cell signaling in Helicobacter pylori infection | 1                                         | 0.4482                      | 1                         |
| Alanine, aspartate and glutamate metabolism                | 1                                         | 0.5142                      | 1                         |
| Aminoacyl-tRNA biosynthesis                                | 1                                         | 0.7708                      | 0.8938                    |
| alpha-Linolenic acid metabolism                            | 1                                         | 1                           | 1                         |
| Graft-versus-host disease                                  | 1                                         | 1                           | 1                         |
| Histidine metabolism                                       | 1                                         | 1                           | 1                         |
| Huntington's disease                                       | 1                                         | 1                           | 1                         |
| Hypertrophic cardiomyopathy (HCM)                          | 1                                         | 1                           | 1                         |
| Intestinal immune network for IgA production               | 1                                         | 1                           | 1                         |
| Legionellosis                                              | 1                                         | 1                           | 1                         |
| Linoleic acid metabolism                                   | 1                                         | 1                           | 1                         |
| Lipoic acid metabolism                                     | 1                                         | 1                           | 1                         |
| Lysine biosynthesis                                        | 1                                         | 1                           | 1                         |
| Amino sugar and nucleotide sugar metabolism                | 1                                         | 1                           | 1                         |
| Maturity onset diabetes of the young                       | 1                                         | 1                           | 1                         |
| Metabolism of xenobiotics by cytochrome P450               | 1                                         | 1                           | 1                         |
| Mineral absorption                                         | 1                                         | 1                           | 1                         |
| Neuroactive ligand-receptor interaction                    | 1                                         | 1                           | 1                         |
| Nicotinate and nicotinamide metabolism                     | 1                                         | 1                           | 0.7818                    |

*Continued on next page*



Table 2 – *Continued from previous page*

| Pathway                                                | <i>p</i> -values<br>(semi-<br>parametric) | <i>p</i> -values<br>(gamma) | <i>p</i> -values<br>(fdr) |
|--------------------------------------------------------|-------------------------------------------|-----------------------------|---------------------------|
| Nitrogen metabolism                                    | 1                                         | 1                           | 1                         |
| One carbon pool by folate                              | 1                                         | 1                           | 1                         |
| Ovarian steroidogenesis                                | 1                                         | 1                           | 1                         |
| Oxidative phosphorylation                              | 1                                         | 1                           | 1                         |
| p53 signaling pathway                                  | 1                                         | 1                           | 1                         |
| Pancreatic secretion                                   | 1                                         | 1                           | 1                         |
| Phenylalanine metabolism                               | 1                                         | 1                           | 1                         |
| Phenylalanine, tyrosine and tryptophan biosynthesis    | 1                                         | 1                           | 1                         |
| Phototransduction                                      | 1                                         | 1                           | 1                         |
| Porphyrin and chlorophyll metabolism                   | 1                                         | 1                           | 1                         |
| Primary bile acid biosynthesis                         | 1                                         | 1                           | 1                         |
| Propanoate metabolism                                  | 1                                         | 1                           | 1                         |
| Proximal tubule bicarbonate reclamation                | 1                                         | 1                           | 1                         |
| Retinol metabolism                                     | 1                                         | 1                           | 1                         |
| Rheumatoid arthritis                                   | 1                                         | 1                           | 1                         |
| Riboflavin metabolism                                  | 1                                         | 1                           | 1                         |
| Salivary secretion                                     | 1                                         | 1                           | 1                         |
| Selenocompound metabolism                              | 1                                         | 1                           | 1                         |
| Small cell lung cancer                                 | 1                                         | 1                           | 1                         |
| Staphylococcus aureus infection                        | 1                                         | 1                           | 1                         |
| Starch and sucrose metabolism                          | 1                                         | 1                           | 1                         |
| Steroid biosynthesis                                   | 1                                         | 1                           | 1                         |
| Sulfur metabolism                                      | 1                                         | 1                           | 1                         |
| Synaptic vesicle cycle                                 | 1                                         | 1                           | 1                         |
| Arginine and proline metabolism                        | 1                                         | 1                           | 1                         |
| Synthesis and degradation of ketone bodies             | 1                                         | 1                           | 1                         |
| Systemic lupus erythematosus                           | 1                                         | 1                           | 1                         |
| Taurine and hypotaurine metabolism                     | 1                                         | 1                           | 1                         |
| Terpenoid backbone biosynthesis                        | 1                                         | 1                           | 1                         |
| Thiamine metabolism                                    | 1                                         | 1                           | 1                         |
| Arrhythmogenic right ventricular cardiomyopathy (ARVC) | 1                                         | 1                           | 1                         |
| Transcriptional misregulation in cancer                | 1                                         | 1                           | 1                         |
| Tryptophan metabolism                                  | 1                                         | 1                           | 1                         |
| Type I diabetes mellitus                               | 1                                         | 1                           | 1                         |
| Asthma                                                 | 1                                         | 1                           | 1                         |
| Tyrosine metabolism                                    | 1                                         | 1                           | 1                         |
| Ubiquinone and other terpenoid-quinone biosynthesis    | 1                                         | 1                           | 1                         |
| Valine, leucine and isoleucine biosynthesis            | 1                                         | 1                           | 1                         |
| Valine, leucine and isoleucine degradation             | 1                                         | 1                           | 1                         |
| Vibrio cholerae infection                              | 1                                         | 1                           | 0.7708                    |
| Viral carcinogenesis                                   | 1                                         | 1                           | 1                         |
| Viral myocarditis                                      | 1                                         | 1                           | 1                         |
| Autoimmune thyroid disease                             | 1                                         | 1                           | 1                         |
| Vitamin B6 metabolism                                  | 1                                         | 1                           | 1                         |

*Continued on next page*

Table 2 – *Continued from previous page*

| Pathway                                                                 | <i>p</i> -values<br>(semi-<br>parametric) | <i>p</i> -values<br>(gamma) | <i>p</i> -values<br>(fdr) |
|-------------------------------------------------------------------------|-------------------------------------------|-----------------------------|---------------------------|
| Vitamin digestion and absorption                                        | 1                                         | 1                           | 1                         |
| Bile secretion                                                          | 1                                         | 1                           | 1                         |
| Biotin metabolism                                                       | 1                                         | 1                           | 1                         |
| Butirosin and neomycin biosynthesis                                     | 1                                         | 1                           | 1                         |
| Caffeine metabolism                                                     | 1                                         | 1                           | 1                         |
| Carbohydrate digestion and absorption                                   | 1                                         | 1                           | 1                         |
| Cardiac muscle contraction                                              | 1                                         | 1                           | 1                         |
| Chemical carcinogenesis                                                 | 1                                         | 1                           | 1                         |
| Citrate cycle (TCA cycle)                                               | 1                                         | 1                           | 1                         |
| Complement and coagulation cascades                                     | 1                                         | 1                           | 1                         |
| Cyanoamino acid metabolism                                              | 1                                         | 1                           | 1                         |
| D-Glutamine and D-glutamate metabolism                                  | 1                                         | 1                           | 1                         |
| Drug metabolism - cytochrome P450                                       | 1                                         | 1                           | 1                         |
| Endocrine and other factor-regulated calcium reabsorption               | 1                                         | 1                           | 1                         |
| Ether lipid metabolism                                                  | 1                                         | 1                           | 1                         |
| Fat digestion and absorption                                            | 1                                         | 1                           | 1                         |
| Fatty acid biosynthesis                                                 | 1                                         | 1                           | 1                         |
| Fatty acid degradation                                                  | 1                                         | 1                           | 1                         |
| Fatty acid elongation                                                   | 1                                         | 1                           | 1                         |
| Folate biosynthesis                                                     | 1                                         | 1                           | 1                         |
| Aldosterone-regulated sodium reabsorption                               | 1                                         | 1                           | 1                         |
| Galactose metabolism                                                    | 1                                         | 1                           | 1                         |
| Gastric acid secretion                                                  | 1                                         | 1                           | 0.8974                    |
| Glutathione metabolism                                                  | 1                                         | 1                           | 1                         |
| Glycerolipid metabolism                                                 | 1                                         | 1                           | 1                         |
| Allograft rejection                                                     | 1                                         | 1                           | 1                         |
| Glycerophospholipid metabolism                                          | 1                                         | 1                           | 1                         |
| Glycolysis / Gluconeogenesis                                            | 1                                         | 1                           | 1                         |
| Glycosaminoglycan biosynthesis - chondroitin sulfate / dermatan sulfate | 1                                         | 1                           | 1                         |
| Glycosaminoglycan degradation                                           | 1                                         | 1                           | 1                         |
| Glycosphingolipid biosynthesis - ganglio series                         | 1                                         | 1                           | 1                         |
| Glycosylphosphatidylinositol(GPI)-anchor biosynthesis                   | 1                                         | 1                           | 1                         |
| Glyoxylate and dicarboxylate metabolism                                 | 1                                         | 1                           | 1                         |

### 3. Supplement C: Identifiability of the mixture model.

First consider the model without covariates. At the global level, the two-component mixture model under the symmetric assumption has marginal density  $f(|z|) = (1 - \pi_1)f_0(|z|) + \pi_1f_1(|z|)$ , where  $f_0$  is a folded  $N(0, \sigma_0^2)$ ,  $f_1$  is a nonparametric non-null distribution with known location  $\mu \geq 0.68$ , and

$\pi_1$  takes the form of the logistic function  $\frac{\exp(\gamma)}{1+\exp(\gamma)}$ . This model is identifiable upon making the center null assumption for  $f_0$  and “zero assumption” of [Efron \(2007\)](#). At the local level, the non-null density is approximated by cubic B-spline density  $g_k(|z|)$  and mixing weight  $c_k$  such that  $f_1(|z|) = \sum_{k=1}^K c_k g_k(|z|)$ . The mixing weight  $c_k$  is a multinomial function  $\frac{\exp(\alpha_k)}{\sum_{l=1}^K \exp(\alpha_l)}$  where  $\sum_{k=1}^K c_k = 1$ . According to [Inkila \(1988\)](#) and [De Boor et al. \(1978\)](#), a sequence of cubic B-splines generated over a strictly increasing sequence of knots is uniquely defined. The overall model is thus identifiable in the case of no covariates.

From here, identifiability of our covariate-modulated model follows in an analogous manner to Theorem 1 of [Huang and Yao \(2012\)](#). In particular, the covariates  $\mathbf{x}$  enter our model through  $\mathbf{x}^T \boldsymbol{\gamma}$  and  $\mathbf{x}^T \boldsymbol{\alpha}$  components in the mixing weights  $\pi_1$  and  $c_k$  respectively. The model conditioning on the covariates  $\mathbf{x}$  is identifiable. Assuming the domain of the covariates  $\mathbf{x}$  has no isolated points, identifiability of our proposed mixture model, then follows through in an identical manner to the proof of Theorem 1 of [Huang and Yao \(2012\)](#).

#### 4. Supplement D: Convergence Diagnosis Plots.

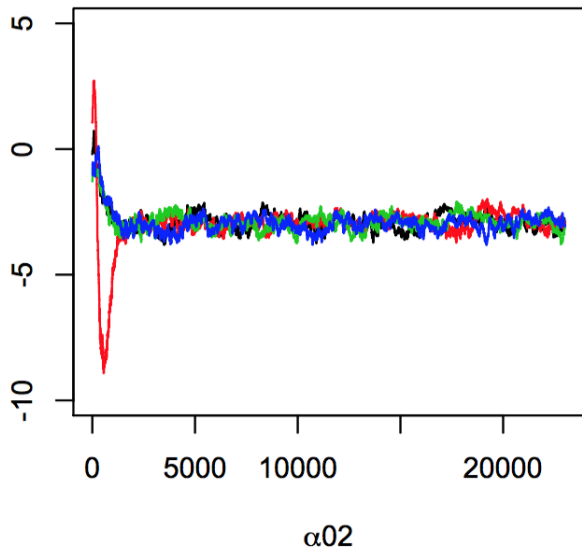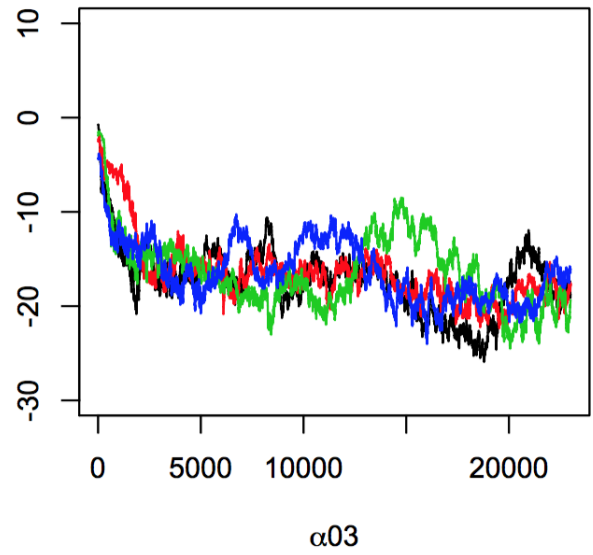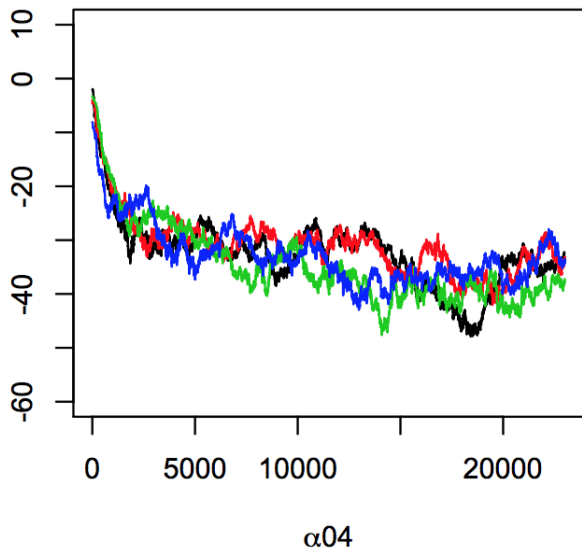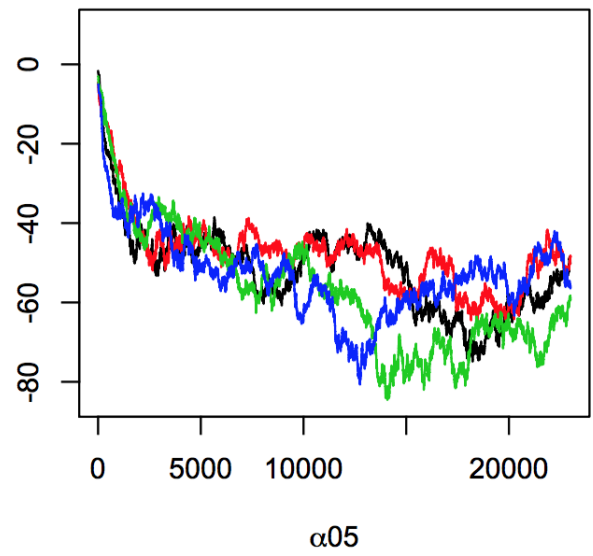

Fig 1: Running mean plot of  $\alpha_{0.}$ , 23000 iterations, 4 chains. (note:  $\alpha_{01} = 0$ ).

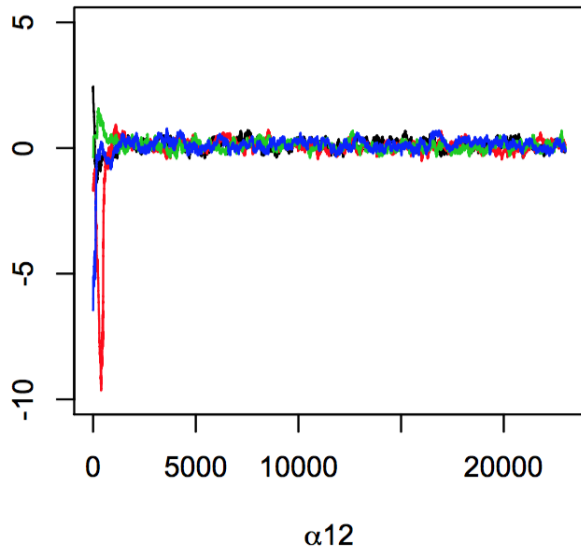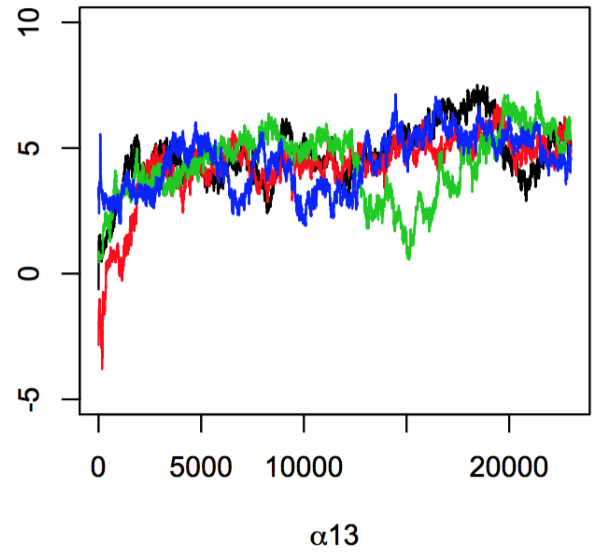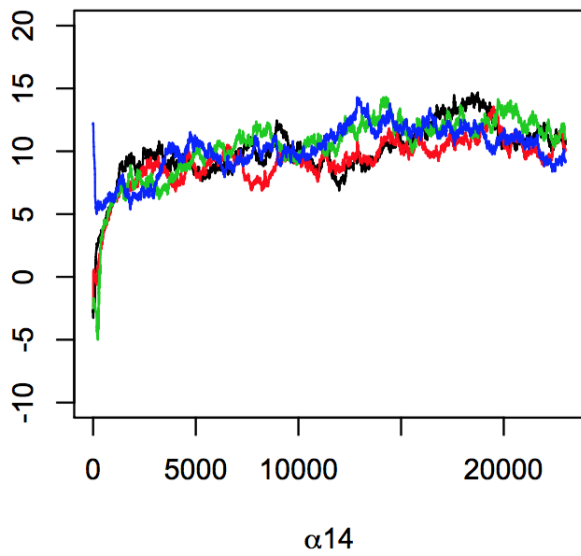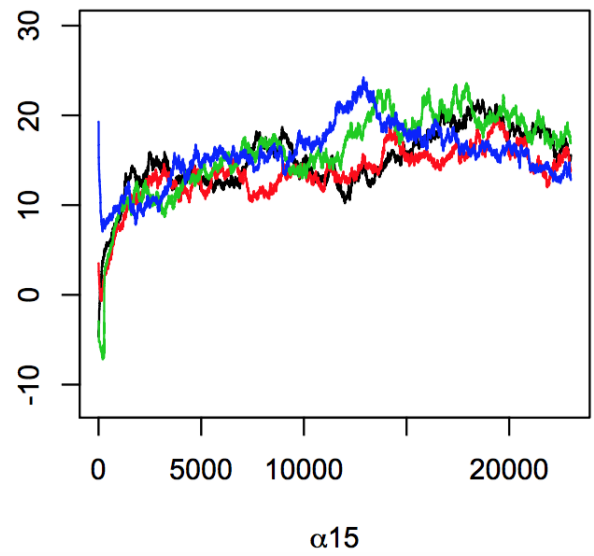

Fig 2: Running mean plot of  $\alpha_{1..}$ , 23000 iterations, 4 chains. (note:  $\alpha_{11} = 0$ ).

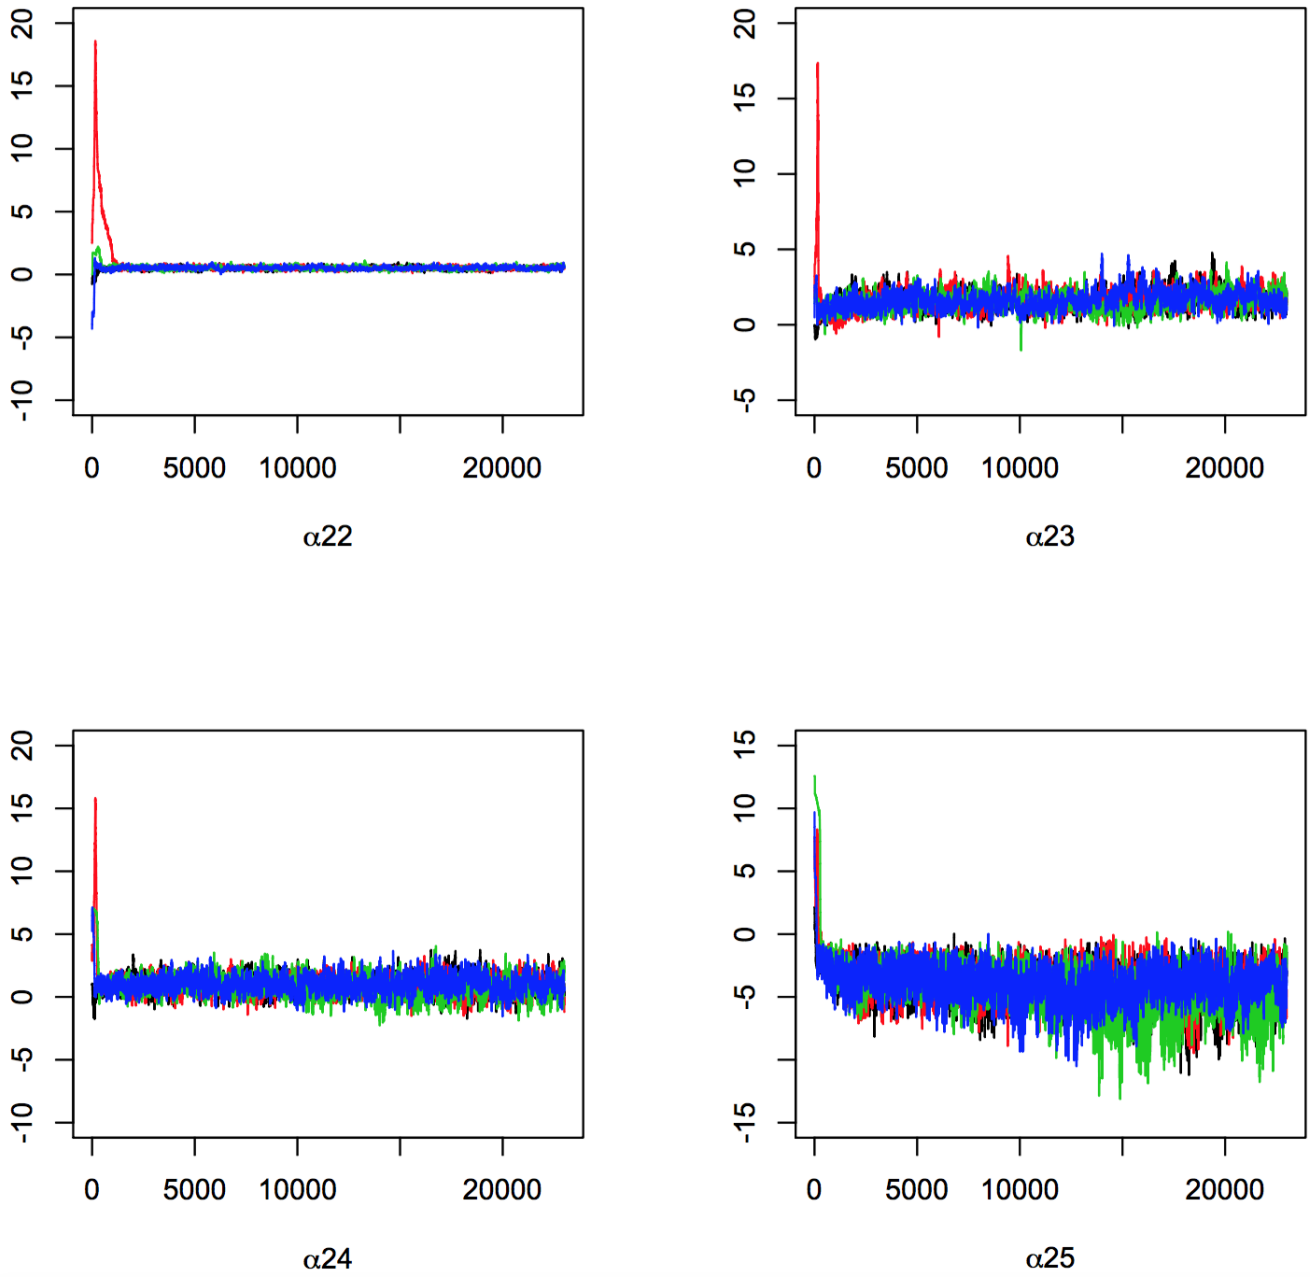

Fig 3: Running mean plot of  $\alpha_{2\cdot}$ , 23000 iterations, 4 chains. (note:  $\alpha_{21} = 0$ ).

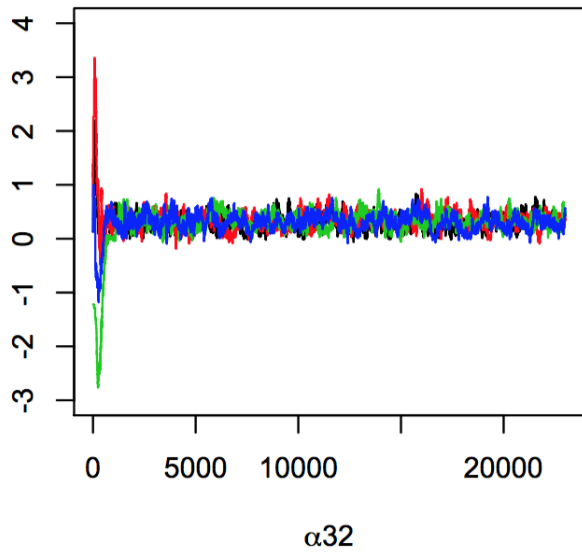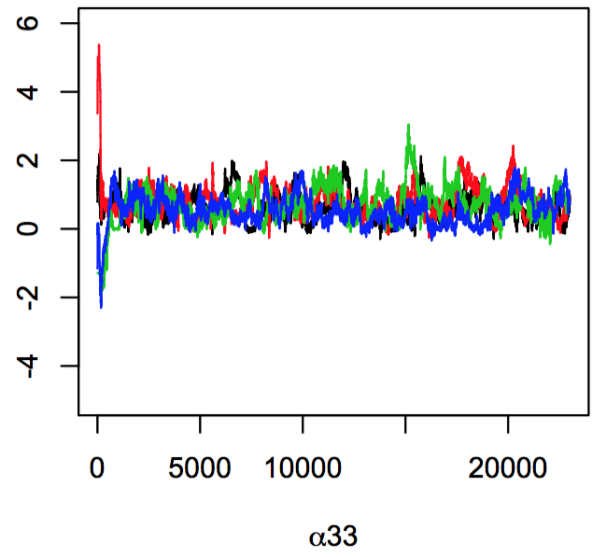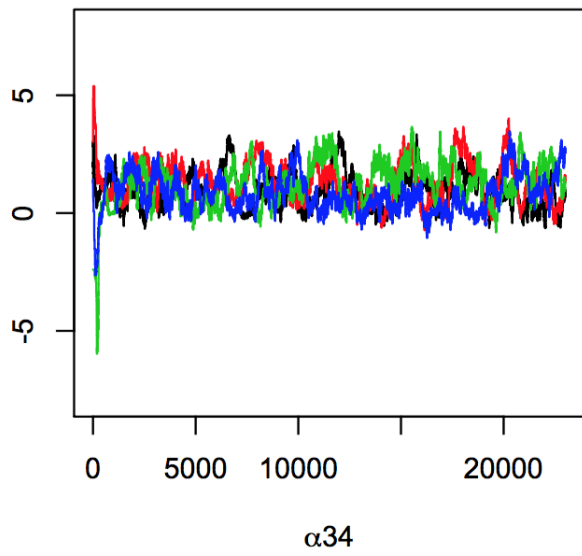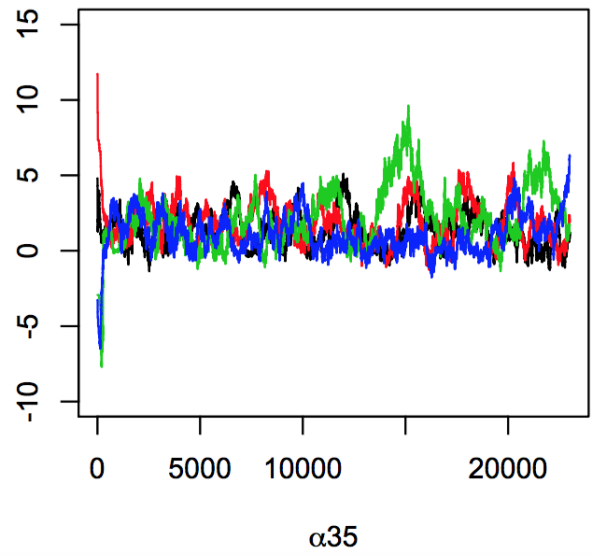

Fig 4: Running mean plot of  $\alpha_{3\cdot}$ , 23000 iterations, 4 chains. (note:  $\alpha_{31} = 0$ ).

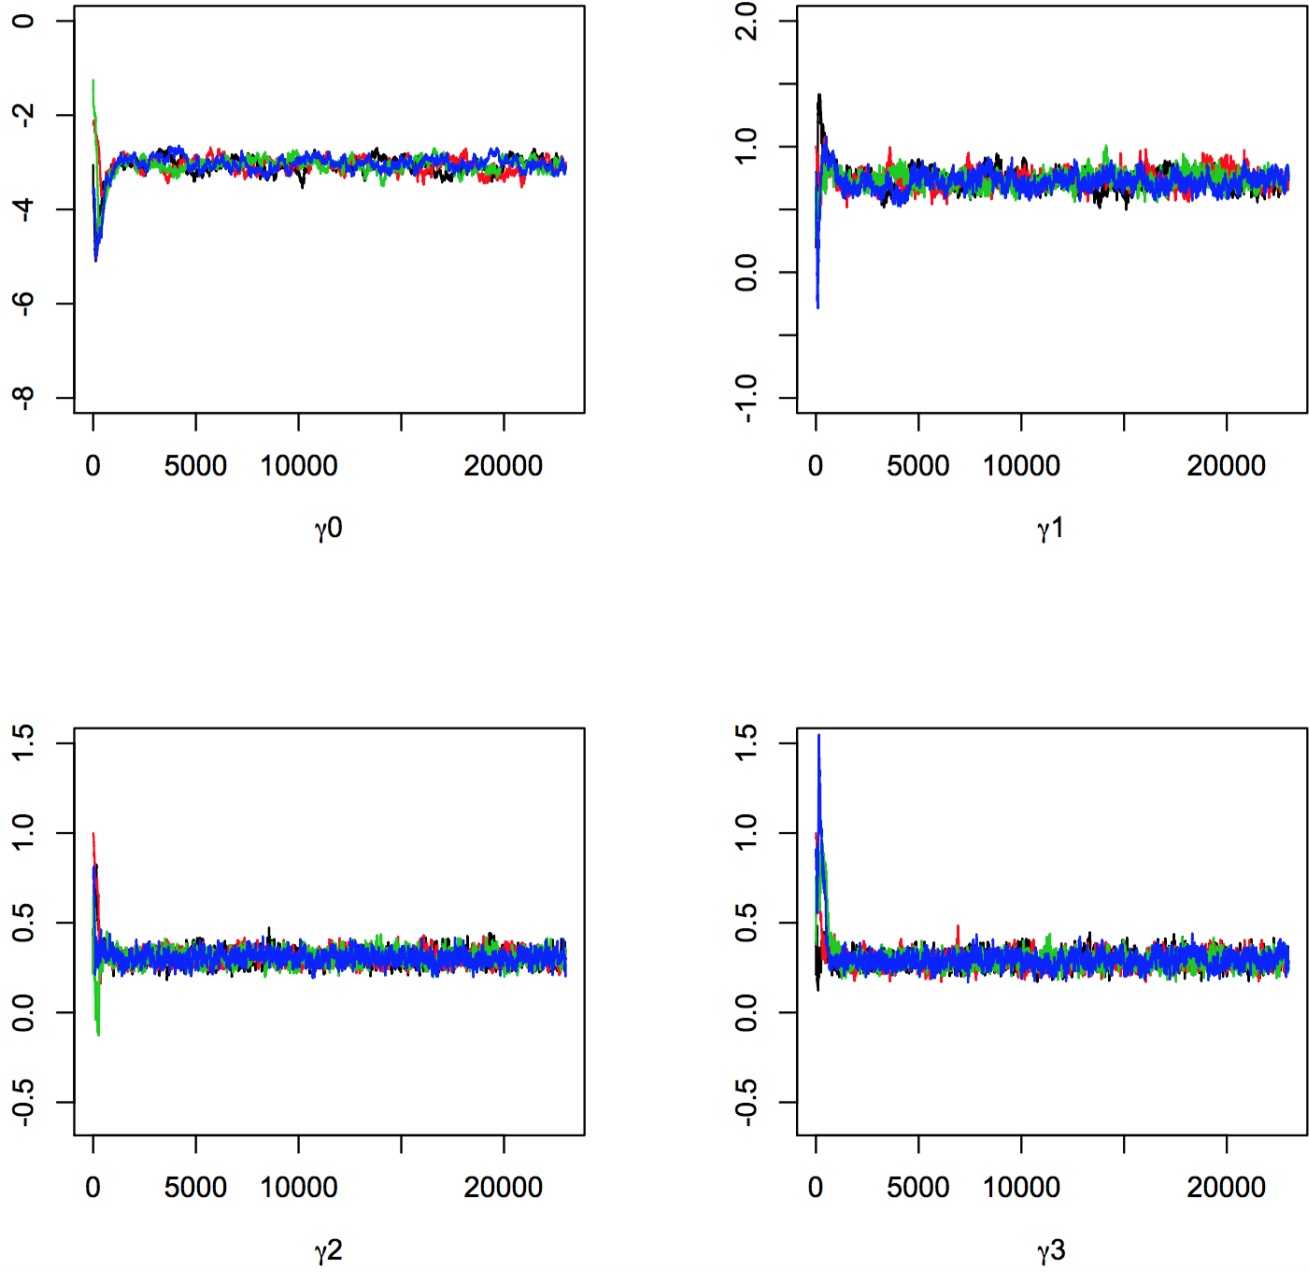

Fig 5: Running mean plot of  $\gamma$ , 23000 iterations, 4 chains.



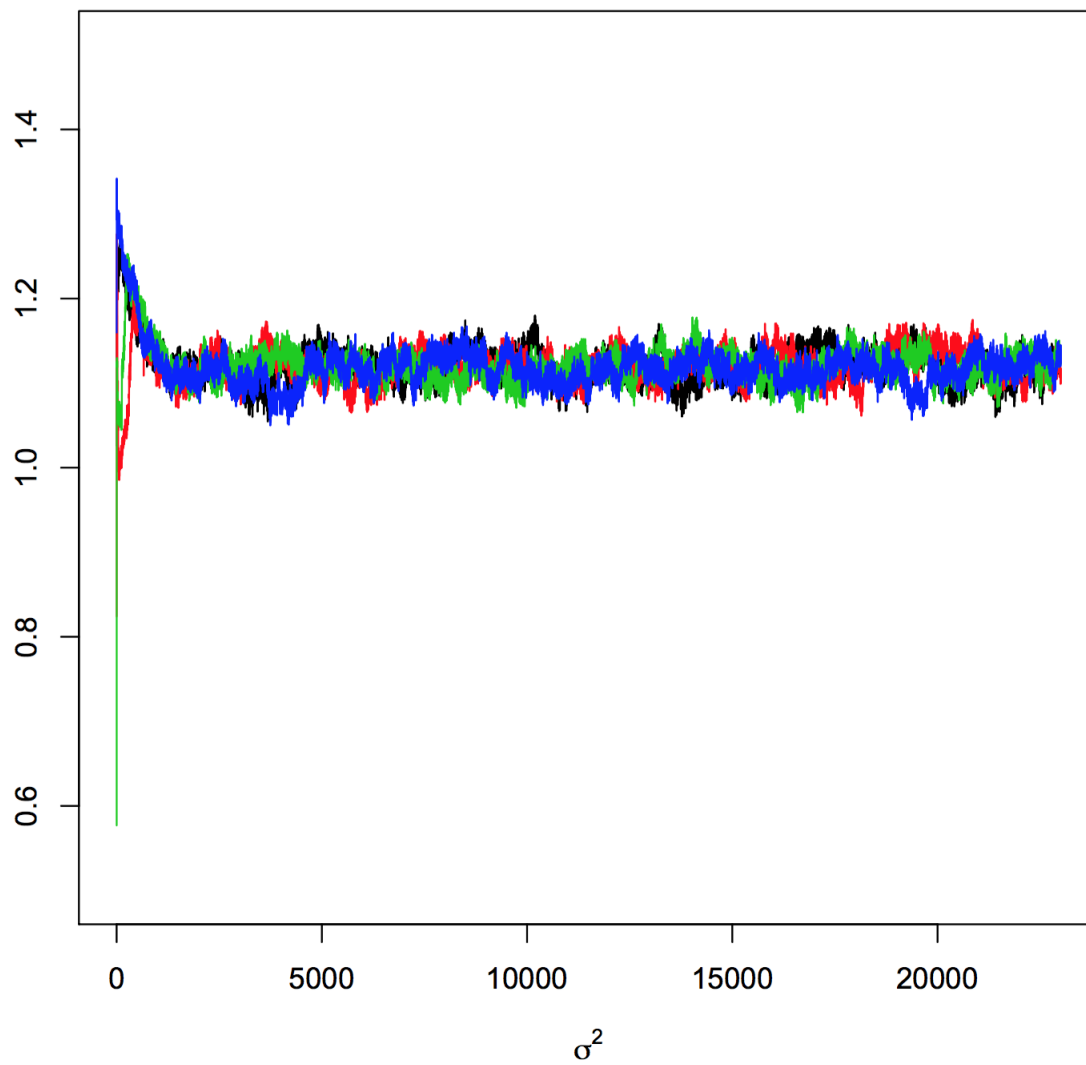

Fig 6: Running mean plot of  $\sigma_0^2$ , 23000 iterations, 4 chains.

## References.

- DE BOOR, C., DE BOOR, C., MATHÉMATICIEN, E.-U., DE BOOR, C. and DE BOOR, C. (1978). *A practical guide to splines* **27**. Springer-Verlag New York.
- EFRON, B. (2007). Size, power and false discovery rates. *The Annals of Statistics* 1351–1377.
- GIVENS, G. H. and HOETING, J. A. (2005). *Computational statistics* **483**. Wiley Interscience Press.
- HUANG, M. and YAO, W. (2012). Mixture of regression models with varying mixing proportions: a semiparametric approach. *Journal of the American Statistical Association* **107** 711–724.
- INKILA, K. (1988). Bicubic B-spline approximation by least squares. In *XVIIth ISPRS Congress, Technical Commission III: Mathematical Analysis of Data XXVII Part B3* 281–287.
- R CORE TEAM (2016). R: A Language and Environment for Statistical Computing R Foundation for Statistical Computing, Vienna, Austria.

RONG W. ZABLOCKI  
 COMPUTATIONAL SCIENCE RESEARCH CENTER  
 SAN DIEGO STATE UNIVERSITY  
 5500 CAMPANILE DRIVE  
 SAN DIEGO, CA 92182  
 USA;  
 INSTITUTE OF MATHEMATICAL SCIENCES  
 CLAREMONT GRADUATE UNIVERSITY  
 150 E. 10TH ST.  
 CLAREMONT, CA 91711  
 USA

ANDREW J. SCHORK  
 COGNITIVE SCIENCES GRADUATE PROGRAM  
 UNIVERSITY OF CALIFORNIA AT SAN DIEGO  
 9500 GILMAN DRIVE  
 LA JOLLA, CA 92093  
 USA

YUNPENG WANG  
 INSTITUTE OF CLINICAL MEDICINE  
 UNIVERSITY OF OSLO  
 OSLO, 0424  
 NORWAY

RICHARD A. LEVINE  
 DEPARTMENT OF MATHEMATICS AND STATISTICS  
 SAN DIEGO STATE UNIVERSITY  
 5500 CAMPANILE DRIVE  
 SAN DIEGO, CA 92182  
 USA

SHUJING XU  
 DEPARTMENT OF PSYCHIATRY  
 UNIVERSITY OF CALIFORNIA AT SAN DIEGO  
 9500 GILMAN DRIVE  
 LA JOLLA, CA 92093  
 USA

CHUN C. FAN  
 COGNITIVE SCIENCES GRADUATE PROGRAM  
 UNIVERSITY OF CALIFORNIA AT SAN DIEGO  
 9500 GILMAN DRIVE  
 LA JOLLA, CA 92093  
 USA

WESLEY K. THOMPSON  
 INSTITUTE OF BIOLOGICAL PSYCHIATRY  
 MENTAL HEALTH CENTRE SCT. HANS  
 MENTAL HEALTH SERVICES COPENHAGEN  
 DK-4000  
 DENMARK  
 DEPARTMENT OF PSYCHIATRY  
 UNIVERSITY OF CALIFORNIA AT SAN DIEGO  
 9500 GILMAN DRIVE  
 LA JOLLA, CA 92093  
 USA E-MAIL: [wes.stat@gmail.com](mailto:wes.stat@gmail.com)
